# Supplementary material for: Synthesis and biological evaluation of hydroxyl-substituted Schiff-bases containing ferrocenyl moieties
Source: Royal Society of Chemistry journal article supplement (doi:10.1039/c3dt51977e), 2013-01-01
Supplement: c3dt51977e.pdf [file c3dt51977e.pdf]

## Supplementary Information

### Synthesis and biological evaluation of hydroxyl-substituted Schiff-bases containing ferrocenyl moieties

Wansong Chen,<sup>a, b, ‡</sup> Weizhu Ou,<sup>a, ‡</sup> Liqiang Wang,<sup>a</sup> Yuanqiang Hao,<sup>a</sup> Jiashun Cheng,<sup>a</sup>  
Juan Li<sup>a, b, \*</sup> and You-Nian Liu<sup>a, b, \*</sup>

<sup>a</sup> *College of Chemistry and Chemical Engineering, Central South University, Changsha, Hunan 410083, P. R. China*

<sup>b</sup> *Key Laboratory of Resource Chemistry of Nonferrous Metals (Central South University), Ministry of Education, Changsha, Hunan 410083, P. R. China*

Figure A.1 <sup>1</sup>H-NMR spectrum of compound 1.

Figure A.2 <sup>13</sup>C-NMR spectrum of compound 1.

Figure A.3 <sup>1</sup>H-NMR spectrum of compound 2.

Figure A.4 <sup>13</sup>C-NMR spectrum of compound 2.

Figure A.5 <sup>1</sup>H-NMR spectrum of compound 3.

Figure A.6 <sup>13</sup>C-NMR spectrum of compound 3.

Figure A.7 <sup>1</sup>H-NMR spectrum of compound 4.

Figure A.8 <sup>13</sup>C-NMR spectrum of compound 4.

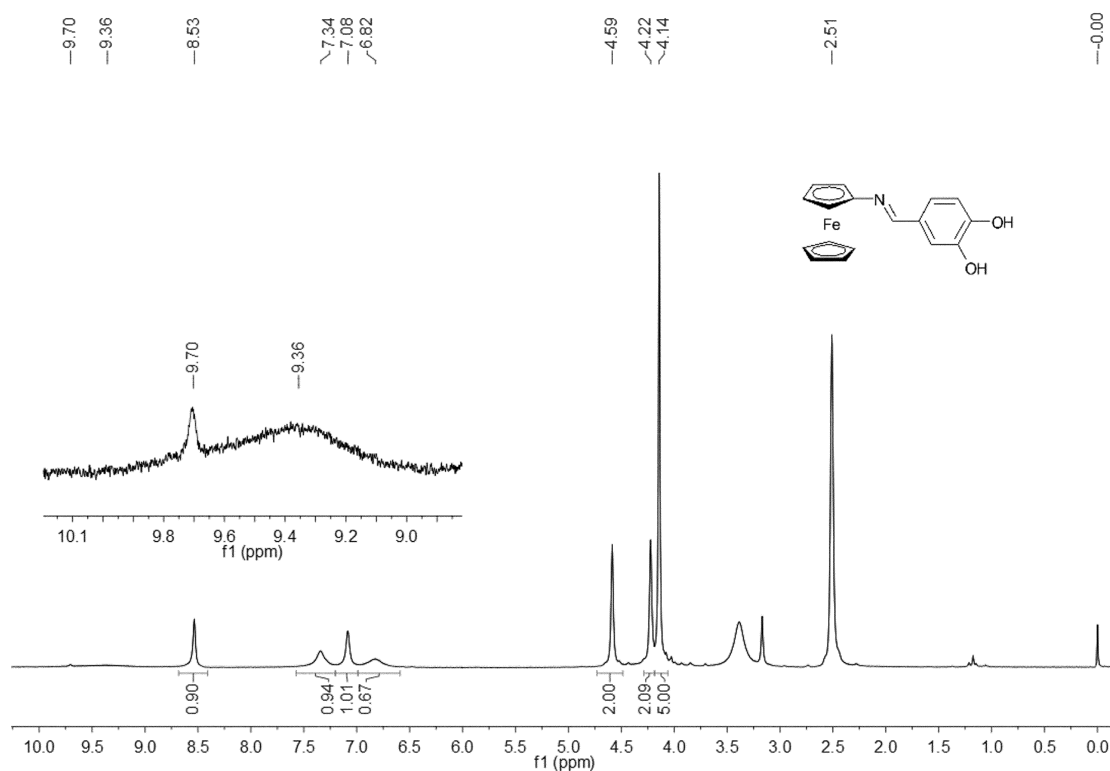

Figure A.1  $^1\text{H-NMR}$  spectrum of compound **1**.

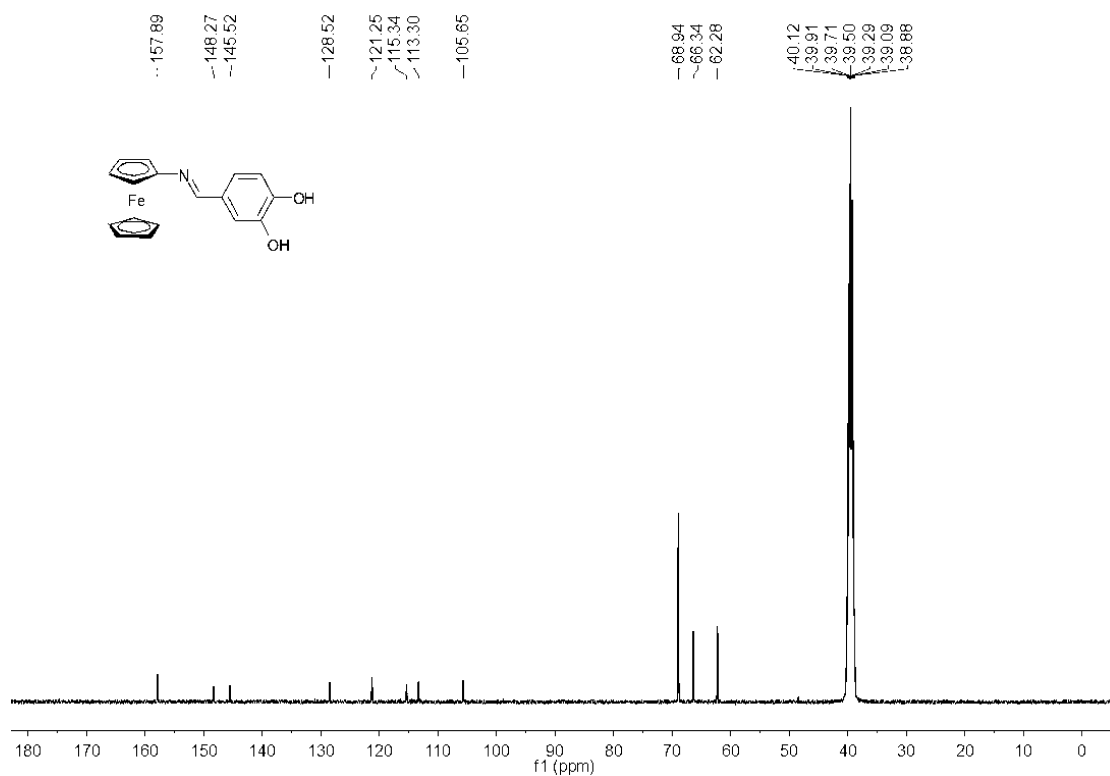

Figure A.2  $^{13}\text{C-NMR}$  spectrum of compound **1**.

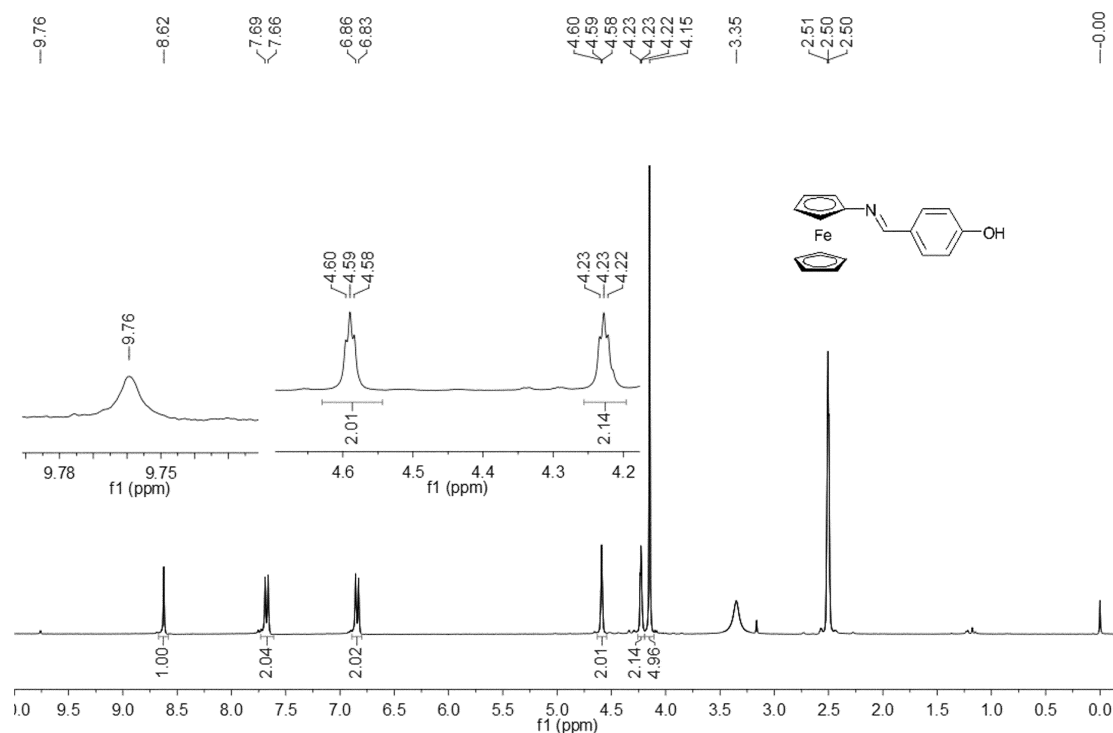

Figure A.3  $^1\text{H-NMR}$  spectrum of compound 2.

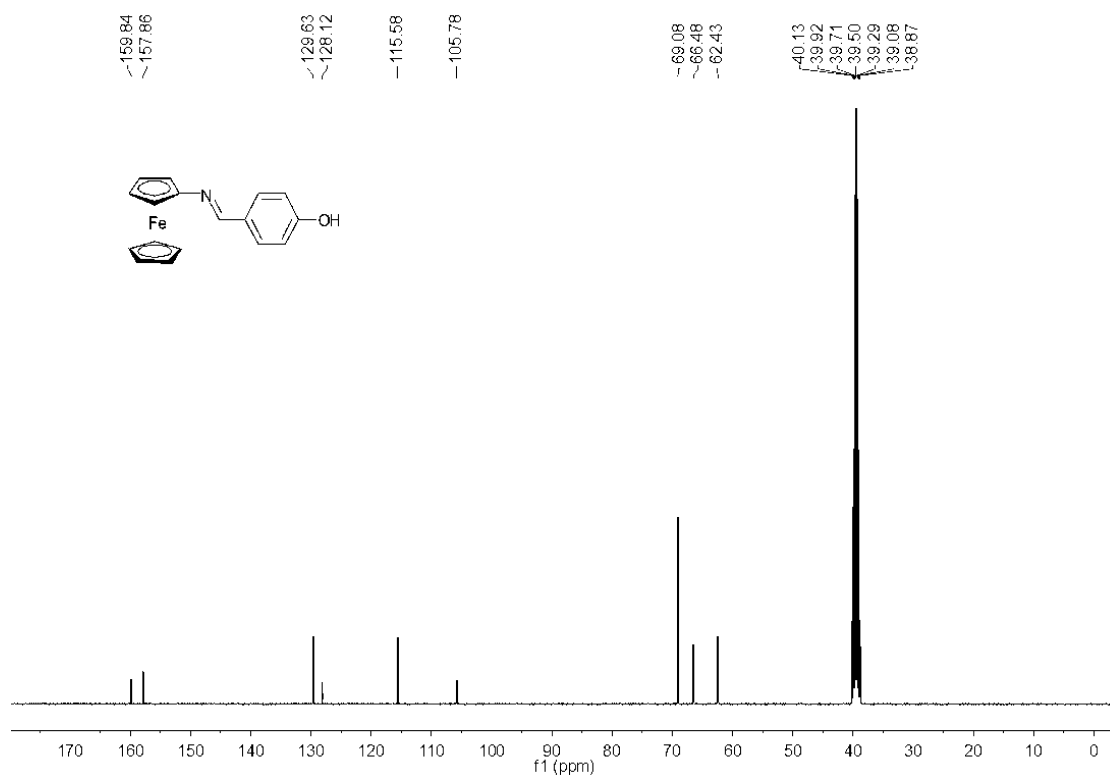

Figure A.4  $^{13}\text{C-NMR}$  spectrum of compound 2.

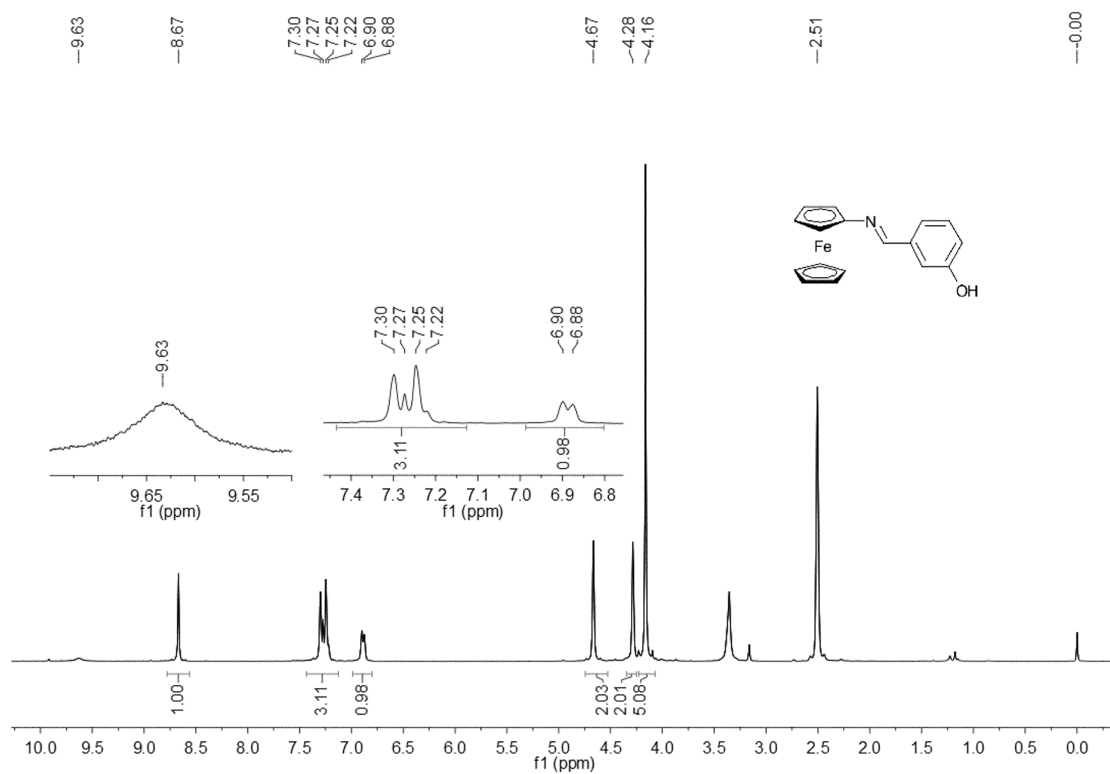

Figure A.5  $^1\text{H-NMR}$  spectrum of compound 3.

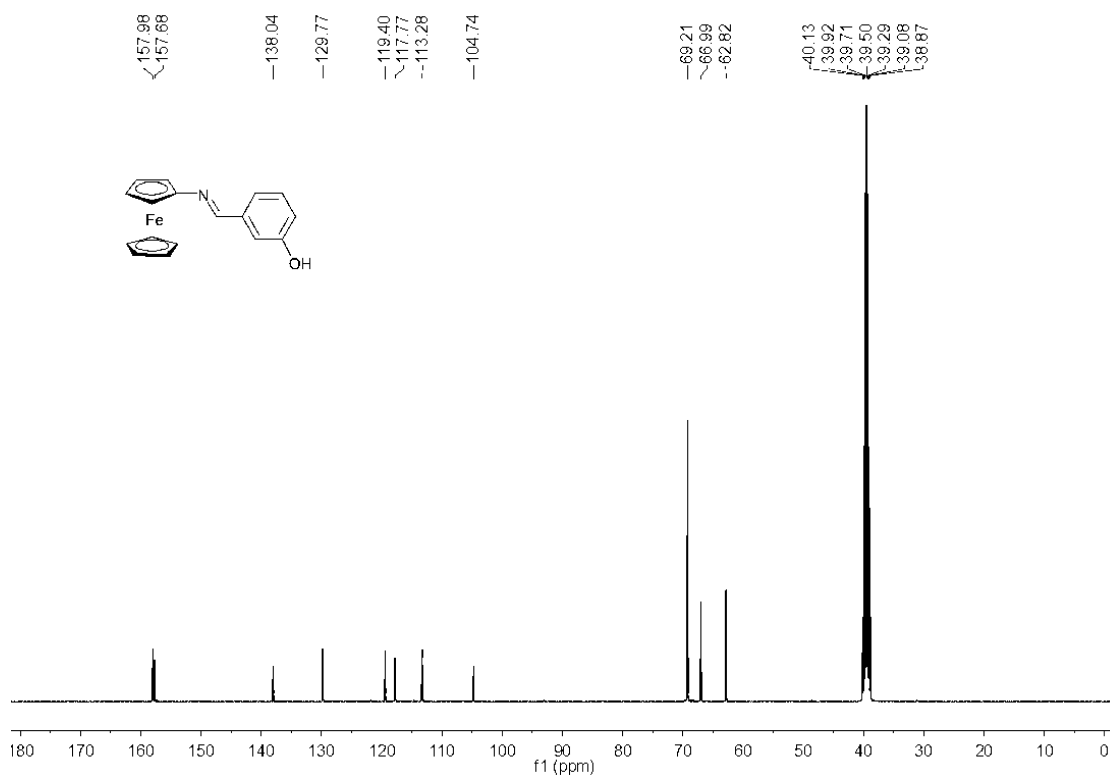

Figure A.6  $^{13}\text{C-NMR}$  spectrum of compound 3.

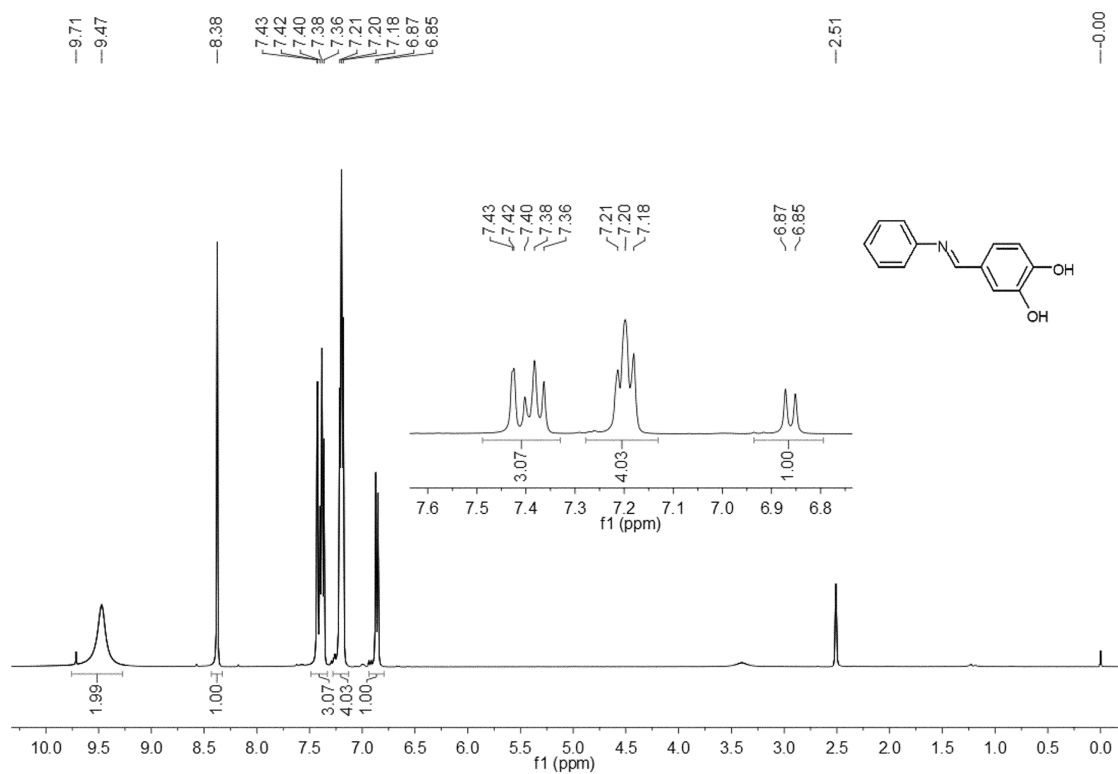

Figure A.7 <sup>1</sup>H-NMR spectrum of compound 4.

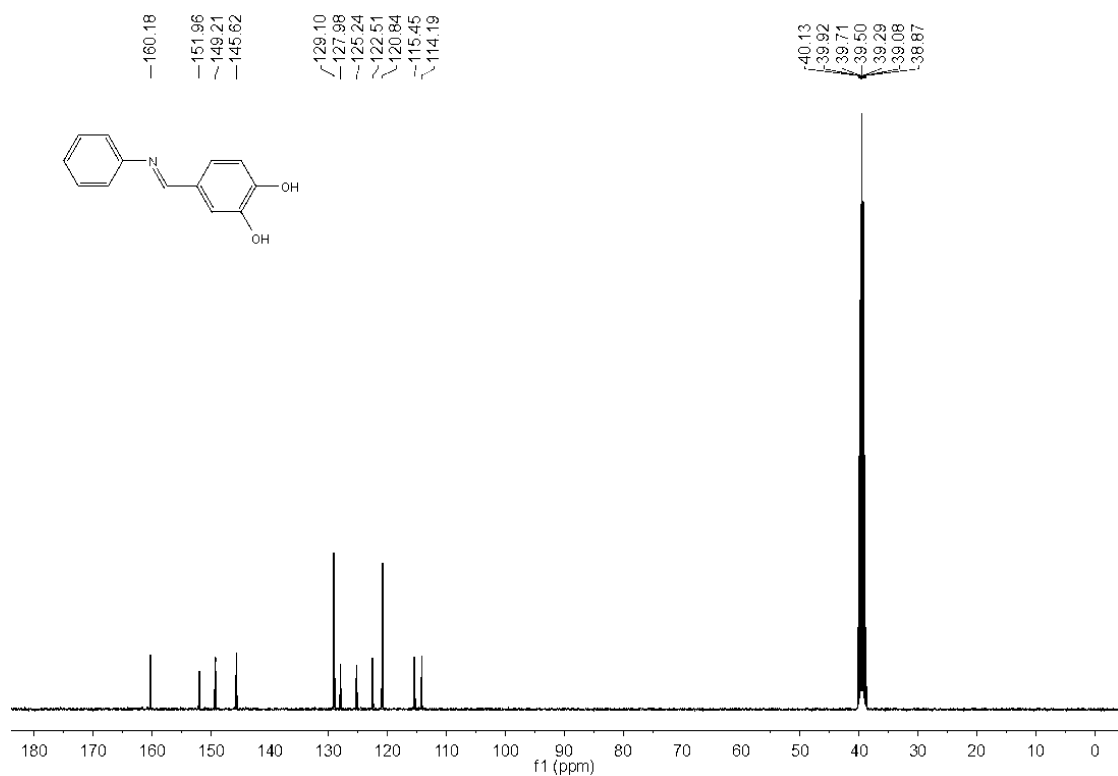

Figure A.8 <sup>13</sup>C-NMR spectrum of compound 4.
